# Supplementary material for: De novo detection of somatic variants in high-quality long-read single-cell RNA sequencing data
Source: Genome Res. 2025 Apr;35(4):900–13. doi: 10.1101/gr.279281.124 (PMC12047253; doi:10.1101/gr.279281.124)
Supplement: Supplement 1 [file Supplemental_Table_S4.xlsx]

## Sheet: Feuille 1
Supplementary Table S4: SNVs detected in bulk panel DNA sequencing of samples derived from omental metastases biopsies of ovarian cancer patients P1, P2 and P3.
Patient	FusionName	LeftGene	RightGene	LeftBreakpoint	RightBreakpoint	CancerCellsWithFusion
P1	GS1-279B7.2--GNG4	GS1-279B7.2	GNG4	chr1:235654008:-	chr1:235583848:-	5
P1	NTN1--CDRT15P2	NTN1	CDRT15P2	chr17:9023391:+	chr17:15765108:+	5
P1	RAPGEF5--AGMO	RAPGEF5	AGMO	chr7:22125604:-	chr7:15201359:-	5
P1	SMG7--CH507-513H4.1	SMG7	CH507-513H4.1	chr1:183472649:+	chr21:8222961:+	26
P2	CBL--KMT2A	CBL	KMT2A	chr11:119232695:+	chr11:118480174:+	17
P2	CTD-2008L17.1--RP11-456O19.2	CTD-2008L17.1	RP11-456O19.2	chr18:55893442:+	chr18:56096075:+	5
P2	DEK--CASC17	DEK	CASC17	chr6:18249578:-	chr17:71185655:-	11
P2	DUXAP10--LA16c-60G3.6	DUXAP10	LA16c-60G3.6	chr14:19062466:+	chr22:15557275:+	7
P2	IGF2BP2--TESPA1	IGF2BP2	TESPA1	chr3:185696612:-	chr12:54950390:-	176
P2	MIR4435-1HG--DARS	MIR4435-1HG	DARS	chr2:111494885:-	chr2:135943480:-	21
P2	PLXNB2--DENND6B	PLXNB2	DENND6B	chr22:50294719:-	chr22:50319003:-	14
P2	PSMB7--SCAI	PSMB7	SCAI	chr9:124405317:-	chr9:125066058:-	51
P2	RMND5B--NHP2	RMND5B	NHP2	chr5:178149680:+	chr5:178153830:-	3
P2	RP11-855A2.2--BPTF	RP11-855A2.2	BPTF	chr17:67822409:+	chr17:67945409:+	10
P2	RP11-96H19.1--RP11-446N19.1	RP11-96H19.1	RP11-446N19.1	chr12:46387972:+	chr12:46652390:+	13
P2	SLC7A6--ELMO3	SLC7A6	ELMO3	chr16:68275249:+	chr16:67202397:+	11
P2	SPATS2--TRA2B	SPATS2	TRA2B	chr12:49461037:+	chr3:185931852:-	21
P2	SRSF7--DHX57	SRSF7	DHX57	chr2:38746144:-	chr2:38815655:-	37
P2	TRIM23--RP11-454P21.1	TRIM23	RP11-454P21.1	chr5:65596421:-	chr5:17769909:+	8
P2	WDR59--AARS	WDR59	AARS	chr16:74903947:-	chr16:70271972:-	8
P3	CBLC--CTC-232P5.1	CBLC	CTC-232P5.1	chr19:44784401:+	chr19:6012120:+	16
P3	SNRNP70--ZIK1	SNRNP70	ZIK1	chr19:49098704:+	chr19:57590011:+	8
