# Supplementary material for: De novo detection of somatic variants in high-quality long-read single-cell RNA sequencing data
Source: Genome Res. 2025 Apr;35(4):900–13. doi: 10.1101/gr.279281.124 (PMC12047253; doi:10.1101/gr.279281.124)
Supplement: Supplement 2 [file Supplemental_Table_S5.xlsx]

## Sheet: Feuille 1
Supplementary Table S5 : LongSom SNV calls that were predicted as clinically relevant by ANNOVAR. An SNV was considered clinically relevant if it completed one of these conditions:
it was flagged as pathogenic by ClinVar (Landrum et al. 2014), P-value was <0.05, the VEST (Carter et al. 2013) P-value was <0.05, the DANN (Quang et al. 2015) rankscore was <0.05, or FATHMM (Rogers et al. 2018) flagged it as deleterious.
Patient	Chr	Start	End	Ref	Alt	Func.refGene	Gene.refGene	CLNSIG	FATHMM_pred	fathmm-MKL_coding_pred	ClinPred_pred	DANN_rankscore	VEST4_score	cosmic70
P1	chr11	126408174	126408174	C	G	exonic	ST3GAL4	.	T	D	D	0.84002	0.776	.
P1	chr12	52241637	52241637	G	T	splicing	KRT7	.	.	D	.	0.68322	.	.
P1	chr12	54370300	54370300	G	T	exonic	ZNF385A	.	T	D	D	0.87661	0.588	.
P1	chr12	95496007	95496007	G	A	exonic	METAP2	.	T	D	D	0.46365	0.721	.
P1	chr17	7587270	7587270	A	G	exonic	MPDU1	.	D	D	D	0.29533	0.753	.
P1	chr17	19663353	19663353	G	C	exonic	ALDH3A2	.	T	D	D	0.29597	0.852	.
P1	chr17	38914324	38914324	G	T	splicing	LASP1	.	.	D	.	0.65684	.	.
P1	chr17	7675160	7675160	G	T	exonic	TP53	Uncertain_significance	D	D	D	0.70898	0.763	ID=COSM259152,COSM2744918,COSM259149,COSM3388218,COSM259151,COSM11476,COSM259150;OCCURENCE=4(lung),1(haematopoietic_and_lymphoid_tissue),1(stomach),4(oesophagus),1(upper_aerodigestive_tract),1(skin),5(breast),6(large_intestine),1(urinary_tract),1(liver),1(pancreas),1(soft_tissue),2(ovary)
P1	chr19	10923313	10923313	G	A	exonic	YIPF2	Uncertain_significance	.	N	T	0.27557	0.153	.
P1	chr19	40441825	40441825	C	T	exonic	SERTAD3	.	.	D	D	0.90852	0.359	.
P1	chr2	97085782	97085782	T	C	exonic	FAHD2B	Uncertain_significance	D	D	T	0.56695	0.42	.
P1	chr2	98644037	98644037	C	T	exonic	MGAT4A	.	.	.	.	.	.	ID=COSM1410230;OCCURENCE=1(large_intestine)
P1	chr2	218403383	218403383	C	G	exonic	CTDSP1	.	.	D	D	0.7015	0.525	.
P1	chr20	45470533	45470533	G	A	splicing	WFDC2	.	.	D	.	0.52075	.	.
P1	chr3	23890507	23890507	A	T	splicing	UBE2E1	.	.	D	.	0.68919	.	.
P1	chr3	196899937	196899937	A	G	exonic	SENP5	.	T	D	D	0.76819	0.273	.
P1	chr5	154920019	154920019	C	A	exonic	GEMIN5	.	T	D	D	0.48019	0.394	.
P1	chr6	12120936	12120936	T	G	exonic	HIVEP1	.	T	D	T	0.37643	0.081	.
P1	chr8	22618439	22618439	C	T	exonic	CCAR2	.	T	D	D	0.99103	0.659	.
P1	chr8	42048734	42048734	G	C	exonic	KAT6A	.	T	D	D	0.20094	0.364	.
P1	chr9	105309769	105309769	C	G	exonic	SLC44A1	.	D	D	D	0.89797	0.788	.
P1	chr9	127508112	127508112	A	G	exonic	NIBAN2	.	T	D	D	0.93013	0.971	.
P2	chr1	6462126	6462126	G	C	exonic	TNFRSF25	.	D	N	T	0.03558	0.144	.
P2	chr11	86012280	86012280	C	T	splicing	PICALM	.	.	D	.	0.62656	.	.
P2	chr17	7674953	7674953	T	C	exonic	TP53	Pathogenic/Likely_pathogenic	D	D	D	0.45862	0.964	ID=COSM3820719,COSM308308,COSM308307,COSM10742,COSM1740322,COSM308309,COSM308306;OCCURENCE=5(stomach),3(central_nervous_system),3(upper_aerodigestive_tract),2(NS),8(oesophagus),12(lung),8(haematopoietic_and_lymphoid_tissue),14(ovary),2(endometrium),16(breast),4(urinary_tract),2(liver),2(prostate),1(biliary_tract),5(large_intestine)
P2	chr2	26034737	26034737	T	A	splicing	RAB10	.	.	D	.	0.54441	.	.
P2	chr20	45947735	45947735	C	T	exonic	PCIF1	.	.	D	T	0.98167	0.512	.
P2	chr20	58895610	58895610	A	G	splicing	GNAS	.	.	D	.	0.67235	.	.
P2	chr3	23945589	23945589	A	G	exonic	NR1D2	.	D	N	T	0.17675	0.237	.
P2	chr3	143014389	143014389	C	G	exonic	U2SURP	.	T	D	D	0.47649	0.538	.
P2	chr3	154284989	154284989	T	A	splicing	DHX36	.	.	D	.	0.55932	.	.
P2	chr5	141580742	141580742	A	T	splicing	DIAPH1	.	.	D	.	0.56957	.	.
P2	chr6	109481687	109481687	G	C	exonic	ZBTB24	.	T	D	D	0.5631	0.565	.
P2	chr7	100607682	100607682	G	A	exonic	PCOLCE	.	T	D	D	0.81353	0.612	.
P2	chr8	140532468	140532468	G	A	exonic	AGO2	.	T	D	D	0.8626	0.812	.
P2	chr9	26892605	26892605	A	C	exonic	CAAP1	.	T	N	D	0.41631	0.397	.
P2	chr9	99960034	99960034	T	A	splicing	STX17	.	.	D	.	0.66154	.	.
P3	chr1	32042525	32042525	A	T	splicing	KHDRBS1	.	.	D	.	0.58759	.	.
P3	chr1	63545986	63545986	A	G	exonic	EFCAB7	.	T	D	T	0.91456	0.964	.
P3	chr11	31463270	31463270	G	A	exonic	IMMP1L	.	T	D	T	0.98721	0.621	.
P3	chr12	1190054	1190054	T	C	splicing	ERC1	.	.	D	.	0.71023	.	.
P3	chr12	53307697	53307697	C	T	exonic	AAAS	Uncertain_significance	D	D	D	0.97801	0.616	ID=COSM175601;OCCURENCE=1(large_intestine)
P3	chr14	20699595	20699595	A	G	exonic	RNASE4	.	T	D	D	0.88995	0.858	.
P3	chr14	22920937	22920937	G	C	exonic	PRMT5	.	T	D	D	0.85666	0.939	.
P3	chr14	104740852	104740852	G	T	exonic	ADSS1	.	T	D	D	0.7713	0.359	.
P3	chr17	7670685	7670685	G	A	exonic	TP53	Pathogenic	.	D	.	0.83119	0.869	ID=COSM99721,COSM11073;OCCURENCE=2(endometrium),6(ovary),16(pancreas),1(kidney),6(liver),2(urinary_tract),8(large_intestine),9(skin),15(breast),1(NS),9(upper_aerodigestive_tract),6(oesophagus),2(stomach),7(central_nervous_system),2(haematopoietic_and_lymphoid_tissue),4(lung),1(peritoneum)
P3	chr19	2247936	2247936	C	T	exonic	SF3A2	.	T	D	D	0.67687	0.517	.
P3	chr19	38306902	38306902	T	C	intronic	YIF1B	.	T	N	.	1e-05	0.038	.
P3	chr19	45067372	45067372	G	C	exonic	CLASRP	.	T	D	T	0.43362	0.259	.
P3	chr2	27433797	27433797	T	A	exonic;splicing	NRBP1;NRBP1	.	.	D	.	0.4523	.	.
P3	chr2	28935520	28935520	G	T	splicing	WDR43	.	.	D	.	0.65788	.	.
P3	chr2	200895287	200895287	G	A	exonic	NIF3L1	.	T	D	D	0.92143	0.416	ID=COSM1133617,COSM418915;OCCURENCE=1(urinary_tract)
P3	chr2	219539619	219539619	C	T	exonic	CHPF	Uncertain_significance	T	D	T	0.75413	0.317	.
P3	chr20	34285504	34285504	G	T	exonic	AHCY	.	D	D	D	0.68322	0.791	.
P3	chr22	31956710	31956710	C	T	exonic	YWHAH	.	T	D	D	0.96359	0.718	.
P3	chr3	23977318	23977318	G	A	exonic	NR1D2	.	D	D	D	0.96204	0.523	.
P3	chr3	141903728	141903728	G	A	exonic	ATP1B3	Uncertain_significance	T	D	D	0.86519	0.336	.
P3	chr3	149375494	149375494	C	T	exonic	TM4SF1	.	T	D	D	0.3658	0.952	.
P3	chr4	154537405	154537405	G	T	exonic	PLRG1	.	T	D	D	0.86955	0.664	.
P3	chr5	176499029	176499029	C	T	exonic	FAF2	.	T	D	D	0.98518	0.316	.
P3	chr7	23680265	23680265	A	G	exonic	FAM221A	.	T	D	D	0.59431	0.401	.
P3	chr9	34098517	34098517	C	A	exonic	DCAF12	.	T	D	D	0.8575	0.966	.
P3	chrX	45063642	45063642	G	C	exonic	KDM6A	.	T	D	T	0.30704	0.282	.
