# Supplementary material for: De novo detection of somatic variants in high-quality long-read single-cell RNA sequencing data
Source: Genome Res. 2025 Apr;35(4):900–13. doi: 10.1101/gr.279281.124 (PMC12047253; doi:10.1101/gr.279281.124)
Supplement: Supplement 7 [file Supplemental_Table_S3.xlsx]

## Sheet: Feuille 1
Supplementary Table S3: SNVs detected in bulk panel DNA sequencing of samples derived from omental metastases biopsies of ovarian cancer patients P1, P2 and P3.
Patient	GENE	FUNCTIONAL IMPACT	PROTEIN CHANGE	CDS CHANGE	POS	COV	% MUT	Detected By LongSom	scRNA Support	Comments
P1	TP53	known	H214R	641A>G	chr17:7674890	1944	1.34	No	Yes	Insuf. mut. cells
P1	TP53	known	P151H	452C>A	chr17:7675160	2223	70.76	Yes	Yes	Detected
P1	BCOR	unknown	P678S	2032C>T	chrX:40073314	1786	59.46	No	Yes	Germline
P1	CD79B	unknown	W76*	228G>A	chr17:63930276	1806	26.25	No	No	No coverage
P1	ESR1	unknown	R269C	805C>T	chr6:151944217	1102	61.71	No	Yes	Germline
P1	MLL2	unknown	R746Q	2237G>A	chr12:49051446	1536	59.77	No	Yes	Germline
P1	NTRK1	unknown	G18E	53G>A	chr1:156860987	860	56.63	No	Yes	Insuf. mut. cells
P1	NTRK1	unknown	M375I	1125G>A	chr1:1568739079	1501	58.29	No	No	No coverage
P2	CBL	known	C384R	1150T>C	chr11:119278221	1137	2.46	No	No	No coverage
P2	ERBB4	known	R782Q	2345G>A	chr2:211562045	1327	72.49	No	Yes	Insuf. cov. noncancer
P2	TP53	known	H193R	578A>G	chr17:7674953	1330	32.63	Yes	Yes	Detected
P2	ABL1	unknown	P975L	2924C>T	chr9:130885214	1628	73.59	No	Yes	Insuf. cov. noncancer
P2	AURKB	unknown	V103M	307G>A	chr17:8207267	1126	35.35	No	No	Not detected
P2	ERBB2	unknown	A414V	1241C>T	chr17:39715464	1338	65.4	No	Yes	Insuf. cov. noncancer
P2	JAK2	unknown	L892V	2674C>G	chr9:5089776	1162	35.89	No	No	No coverage
P2	KLHL6	unknown	A530T	1588G>A	chr3:183492205	1553	33.16	No	Yes	Insuf. mut. cells
P2	MAP3K1	unknown	S939C	2816C>G	chr5:56882016	715	34.41	No	No	No coverage
P2	MERTK	unknown	R421Q	1262G>A	chr2:111982959	1702	38.95	No	Yes	Insuf. mut. cells
P2	MLL2	unknown	R3127C	9379C>T	chr12:49037977	2266	49.91	No	Yes	Insuf. mut. cells
P2	MYCN	unknown	M1I	3G>T	chr2:15942067	1071	51.82	No	No	No coverage
P2	SMO	unknown	R257Q	770G>A	chr7:129205632	965	49.95	No	No	No coverage
P2	TSC2	unknown	V1673I	5017G>A	chr16:2087890	828	32.97	No	Yes	Insuf. mut. cells
P3	TP53	known	R342*	1024C>T	chr17:7670685	512	51.95	Yes	Yes	Detected
P3	CASP8	unknown	R134K	401G>A	chr2:201269605	1015	8.47	No	No	Not detected
P3	FANCA	unknown	T541N	1622C>A	chr16:89782863	296	63.51	No	Yes	Insuf. mut. cells
P3	KIT	unknown	I403V	1207A>G	chr4:54709515	577	23.40	No	No	No coverage
P3	PALB2	unknown	R37G	109C>G	chr16:23637952	788	49.24	No	Yes	Germline
P3	VEGFA	unknown	G19R	55G>C	chr6:43770761	485	9.90	No	No	Not detected
P3	ZNF217	unknown	M410V	1228A>G	chr20:53581599	1331	42.15	No	Yes	Germline
P2	NF2	unknown	T180_M183 del	538_549del ACTCCGGAAATG	chr22:30051603	1003	26.52	NA	NA	Manual detect.
P3	TSC2	likely	T783fs*45	2348_2351del CCAA	chr16:2122976	292	30.82	NA	NA	Manual detect.
